# Supplementary material for: Comparing 5G hybrid beamforming in indoor environments—collocated vs distributed mmWave arrays
Source: Frontiers journal article supplement (doi:10.3389/frcmn.2024.1354628), 2024-06-21
Supplement: Presentation_1.pdf [file Presentation_1.pdf]

## Supplementary Appendix S1

### 1 DERIVATION OF SINR

Using Eq. (3) in the paper, the total received signal by  $k$ -th UE,  $y_k$ , can be written as

$$\begin{aligned}
 y_k &= \mathbf{H}_{k:} \sqrt{G_{RF}} \mathbf{p} + n_k \\
 &= \mathbf{H}_{k:} \sqrt{G_{RF}} \mathbf{W} \mathbf{x} + n_k \\
 &= \underbrace{\mathbf{H}_{k:} \sqrt{G_{RF}} \mathbf{W}_{:k} x_k}_{\text{received signal}} + \underbrace{\sum_{k' \neq k}^K \mathbf{H}_{k:} \sqrt{G_{RF}} \mathbf{W}_{:k'} x_{k'}}_{\text{interference}} + \underbrace{n_k}_{\text{noise}},
 \end{aligned} \tag{S1}$$

where  $\mathbf{H}_{k:}$  is the  $k$ -th row of matrix  $\mathbf{H}$  and  $\mathbf{W}_{:k}$  is the  $k$ -th column of matrix  $\mathbf{W}$ . The transmit signals  $x_k$  are uncorrelated and have unit power. Therefore, the power of a received signal by  $k$ -th UE can be written as

$$\mathbb{E} \left\{ |y_k|^2 \right\} = \underbrace{G_{RF} |\mathbf{H}_{k:} \mathbf{W}_{:k}|^2}_{\text{received signal}} + \underbrace{G_{RF} \sum_{k' \neq k}^K |\mathbf{H}_{k:} \mathbf{W}_{:k'}|^2}_{\text{interference}} + \underbrace{\sigma_n^2}_{\text{noise}}. \tag{S2}$$

Hence the SINR for  $k$ -th UE can be written as

$$\begin{aligned}
 \text{SINR}_k &= \frac{S_k}{I_k + N_k} \\
 &= \frac{G_{RF} |\mathbf{H}_{k:} \mathbf{W}_{:k}|^2}{G_{RF} \sum_{k' \neq k}^K |\mathbf{H}_{k:} \mathbf{W}_{:k'}|^2 + \sigma_n^2}
 \end{aligned} \tag{S3}$$

By replacing the ZF's precoding matrix definition in Eq. (4) of the paper, into Eq. (S3), as following:

$$\begin{aligned}
 \mathbf{y} &= \mathbf{H} \sqrt{G_{RF}} \mathbf{W} \mathbf{x} + \mathbf{n} \\
 &= \sqrt{G_{RF}} \frac{\mathbf{H} \mathbf{H}^\dagger (\mathbf{H} \mathbf{H}^\dagger)^{-1}}{\left\| \mathbf{H}^\dagger (\mathbf{H} \mathbf{H}^\dagger)^{-1} \right\|_F} \mathbf{x} + \mathbf{n} \\
 &= \sqrt{G_{RF}} \frac{\mathbf{I}_K}{\left\| \mathbf{H}^\dagger (\mathbf{H} \mathbf{H}^\dagger)^{-1} \right\|_F} \mathbf{x} + \mathbf{n},
 \end{aligned} \tag{S4}$$

where  $\mathbf{I}_K$  is the identity matrix of size  $K$ , the received signal by  $k$ -th UE can be written as,

$$y_k = \frac{\sqrt{G_{RF}}}{\left\| \mathbf{H}^\dagger (\mathbf{H} \mathbf{H}^\dagger)^{-1} \right\|_F} x_k + n_k. \tag{S5}$$

This equation shows that using the ZF precoding, there will be no interference at the UE locations.
