# Supplementary material for: Comparing 5G hybrid beamforming in indoor environments—collocated vs distributed mmWave arrays
Source: Frontiers journal article supplement (doi:10.3389/frcmn.2024.1354628), 2024-06-21
Supplement: Presentation_3.pdf [file Presentation_3.pdf]

## Supplementary Appendix S3

### 1 MONOTONIC INCREASE OF SINR AS FUNCTION OF CONDUCTED POWER GAIN

Let us rewrite Eq. (S3) of Supplementary Appendix S1 as below

$$\text{SINR}_k = \frac{G_{RF} S_{k0}}{G_{RF} I_{k0} + N_k}, \quad (\text{S1})$$

where  $S_{k0} = |\mathbf{H}_k: \mathbf{W}_{:k}|^2 > 0$ ,  $I_{k0} = \sum_{k' \neq k}^K |\mathbf{H}_k: \mathbf{W}_{:k'}|^2 \geq 0$  and  $N_k > 0$ . Because  $G_{RF}$  and  $\mathbf{W}$  are independent,  $G_{RF}$  is also independent of  $S_{k0}$  and  $I_{k0}$ . The derivative of  $\text{SINR}_k$  of  $G_{RF}$  is

$$\frac{d\text{SINR}_k}{dG_{RF}} = \frac{S_{k0} N_k}{(G_{RF} I_{k0} + N_k)^2}, \quad (\text{S2})$$

which is always greater than zero. Therefore  $\text{SINR}_k$  is an increasing function of  $G_{RF}$ . It is worth noting that in the case when  $G_{RF} I_{k0} \gg N_k$  then  $\text{SINR}_k$  S1 becomes independent of  $G_{RF}$ . This may happen in the ideal noise-free conditions, but also in more practical conditions when either  $G_{RF} \gg N_k / I_{k0}$  or  $I_{k0} \gg N_k / G_{RF}$ .
